# Supplementary material for: Biosorption Potential of Phanerochaete chrysosporium for Arsenic, Cadmium, and Chromium Removal from Aqueous Solutions
Source: PubMed Central journal article supplement (PMC6607372; doi:10.1002/gch2.201800064), 2018-10-25
Supplement: GCH2-2-1800064-s001.pdf [file GCH2-2-1800064-s001.pdf]

# Global Challenges

---

Open Access

## Supporting Information

for *Global Challenges*, DOI: 10.1002/gch2.201800064

Biosorption Potential of *Phanerochaete chrysosporium* for Arsenic, Cadmium, and Chromium Removal from Aqueous Solutions

*Darshan M. Rudakiya, Vignesh Iyer, Darsh Shah, Akshaya Gupte, and Kaushik Nath\**

# **Biosorption potential of *Phanerochaete chrysosporium* for arsenic, cadmium and chromium removal from aqueous solutions**

Darshan M. Rudakiya <sup>1, ‡</sup>, Vignesh Iyer <sup>2, ‡</sup>, Darsh Shah <sup>2</sup>, Akshaya Gupte <sup>1</sup>, Kaushik Nath <sup>2, \*</sup>

<sup>‡</sup> contributed equally to this work and are co-first authors.

<sup>1</sup> Department of Microbiology, N. V. Patel College of Pure & Applied Sciences, Vallabh Vidyanagar – 388 120, Anand, Gujarat, India

<sup>2</sup> Department of Chemical Engineering, G. H. Patel College of Engineering & Technology, Vallabh Vidyanagar – 388 120, Anand, Gujarat, India

---

\*Corresponding author

Prof. Kaushik Nath,

Head,

Department of Chemical Engineering,

G. H. Patel College of Engineering & Technology,

Vallabh Vidyanagar – 388 120,

Anand, Gujarat, India

Email: kaushiknath@gcet.ac.in

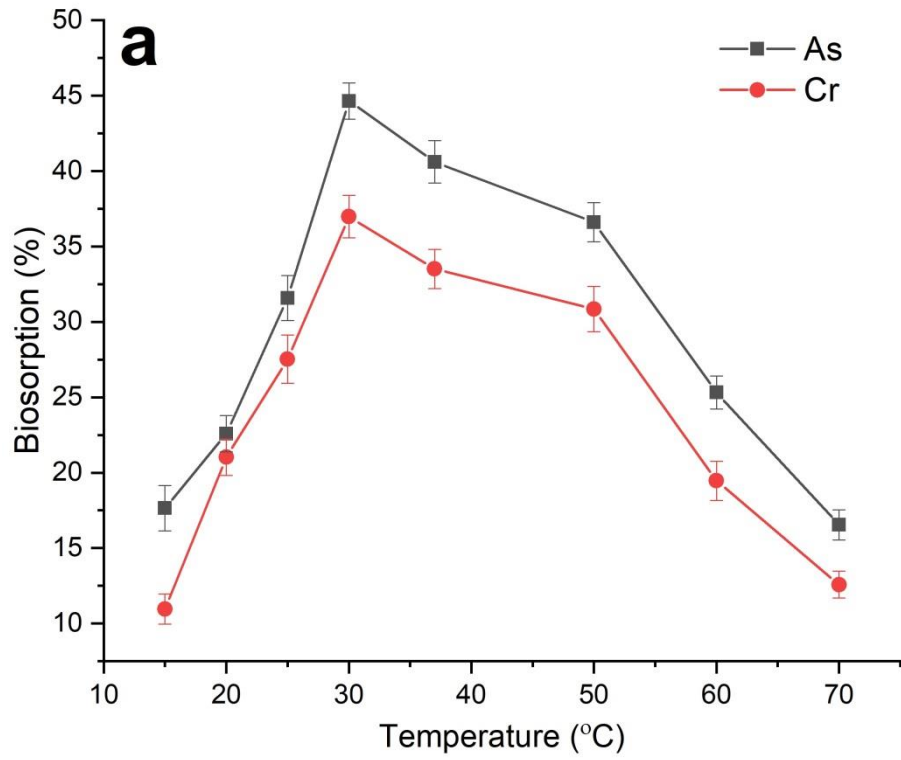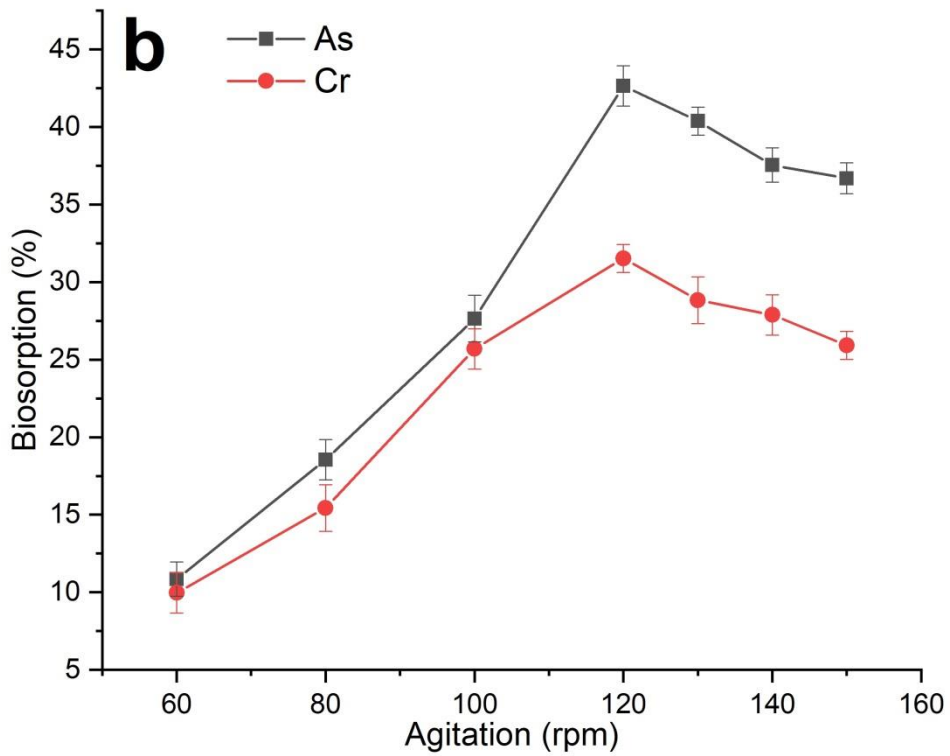

**Figure S1** Effect of temperature and agitation on the As and Cr biosorption efficiency by *P. chrysosporium*.

**Table S1** Independent components and their values used for individual and simultaneous removal of metal ions in central composite design (CCD).

| <b>Factor Name</b>                            | <b>Units</b>       | <b>+<math>\alpha</math></b> | <b>+1</b> | <b>0</b> | <b>-1</b> | <b>-<math>\alpha</math></b> |
|-----------------------------------------------|--------------------|-----------------------------|-----------|----------|-----------|-----------------------------|
| pH                                            | -                  | 10.70                       | 9.00      | 6.50     | 4.00      | 2.30                        |
| Fungal biomass                                | mg                 | 552.27                      | 450.00    | 300.00   | 150.00    | 47.73                       |
| Metal Concentration<br>(for individual metal) | mg L <sup>-1</sup> | 110.45                      | 90.00     | 60.00    | 30.00     | 9.55                        |
| Metal Concentration<br>(for mixed metal)      | mg L <sup>-1</sup> | 331.36                      | 270.00    | 180.00   | 90.00     | 28.64                       |

**Table S2** Analysis of variance (ANOVA) for the experiments of CCD for individual metal removal a) As b) Cd and c) Cr

**Individual metal removal**

**(i) As**

| Source           | Sum of Squares | df | Mean Square | F-value | p-value  |                 |
|------------------|----------------|----|-------------|---------|----------|-----------------|
| <b>Model</b>     | 17846.69       | 9  | 1982.97     | 175.17  | < 0.0001 | Significant     |
| A-pH             | 235.01         | 1  | 235.01      | 20.76   | 0.0010   |                 |
| B-As Conc        | 2345.74        | 1  | 2345.74     | 207.22  | < 0.0001 |                 |
| C-Fungal biomass | 3346.97        | 1  | 3346.97     | 295.66  | < 0.0001 |                 |
| AB               | 74.87          | 1  | 74.87       | 6.61    | 0.0278   |                 |
| AC               | 97.78          | 1  | 97.78       | 8.64    | 0.0148   |                 |
| BC               | 105.86         | 1  | 105.86      | 9.35    | 0.0121   |                 |
| A <sup>2</sup>   | 11345.47       | 1  | 11345.47    | 1002.22 | < 0.0001 |                 |
| B <sup>2</sup>   | 428.10         | 1  | 428.10      | 37.82   | 0.0001   |                 |
| C <sup>2</sup>   | 635.51         | 1  | 635.51      | 56.14   | < 0.0001 |                 |
| <b>Residual</b>  | 113.20         | 10 | 11.32       |         |          |                 |
| Lack of Fit      | 70.74          | 5  | 14.15       | 1.67    | 0.2946   | not significant |
| Pure Error       | 42.47          | 5  | 8.49        |         |          |                 |
| <b>Cor Total</b> | 17959.89       | 19 |             |         |          |                 |

|                                |        |
|--------------------------------|--------|
| <b>R<sup>2</sup></b>           | 0.9937 |
| <b>Adjusted R<sup>2</sup></b>  | 0.9880 |
| <b>Predicted R<sup>2</sup></b> | 0.9666 |

**(ii) Cd**

| Source           | Sum of Squares | df | Mean Square | F-value | p-value  |                 |
|------------------|----------------|----|-------------|---------|----------|-----------------|
| <b>Model</b>     | 7010.00        | 9  | 778.89      | 38.92   | < 0.0001 | Significant     |
| A-pH             | 1139.86        | 1  | 1139.86     | 56.96   | < 0.0001 |                 |
| B-Cd Conc        | 1885.71        | 1  | 1885.71     | 94.23   | < 0.0001 |                 |
| C-Fungal biomass | 202.77         | 1  | 202.77      | 10.13   | 0.0098   |                 |
| AB               | 43.83          | 1  | 43.83       | 2.19    | 0.1697   |                 |
| AC               | 9.73           | 1  | 9.73        | 0.4862  | 0.5015   |                 |
| BC               | 1.56           | 1  | 1.56        | 0.0778  | 0.7860   |                 |
| A <sup>2</sup>   | 3398.62        | 1  | 3398.62     | 169.82  | < 0.0001 |                 |
| B <sup>2</sup>   | 132.61         | 1  | 132.61      | 6.63    | 0.0277   |                 |
| C <sup>2</sup>   | 543.85         | 1  | 543.85      | 27.18   | 0.0004   |                 |
| <b>Residual</b>  | 200.13         | 10 | 20.01       |         |          |                 |
| Lack of Fit      | 122.52         | 5  | 24.50       | 1.58    | 0.3143   | not significant |
| Pure Error       | 77.61          | 5  | 15.52       |         |          |                 |
| <b>Cor Total</b> | 7210.13        | 19 |             |         |          |                 |

|                                |        |
|--------------------------------|--------|
| <b>R<sup>2</sup></b>           | 0.9722 |
| <b>Adjusted R<sup>2</sup></b>  | 0.9473 |
| <b>Predicted R<sup>2</sup></b> | 0.8496 |

**(iii) Cr**

| <b>Source</b>    | <b>Sum of Squares</b> | <b>df</b> | <b>Mean Square</b> | <b>F-value</b> | <b>p-value</b> |                 |
|------------------|-----------------------|-----------|--------------------|----------------|----------------|-----------------|
| <b>Model</b>     | 14255.27              | 9         | 1583.92            | 50.60          | < 0.0001       | Significant     |
| A-pH             | 7868.19               | 1         | 7868.19            | 251.36         | < 0.0001       |                 |
| B-Cr Conc        | 740.02                | 1         | 740.02             | 23.64          | 0.0007         |                 |
| C-Fungal biomass | 2005.69               | 1         | 2005.69            | 64.07          | < 0.0001       |                 |
| AB               | 2.74                  | 1         | 2.74               | 0.0874         | 0.7735         |                 |
| AC               | 47.18                 | 1         | 47.18              | 1.51           | 0.2477         |                 |
| BC               | 171.10                | 1         | 171.10             | 5.47           | 0.0415         |                 |
| A <sup>2</sup>   | 2754.51               | 1         | 2754.51            | 88.00          | < 0.0001       |                 |
| B <sup>2</sup>   | 10.04                 | 1         | 10.04              | 0.3206         | 0.5837         |                 |
| C <sup>2</sup>   | 819.46                | 1         | 819.46             | 26.18          | 0.0005         |                 |
| <b>Residual</b>  | 313.03                | 10        | 31.30              |                |                |                 |
| Lack of Fit      | 206.34                | 5         | 41.27              | 1.93           | 0.2433         | not significant |
| Pure Error       | 106.69                | 5         | 21.34              |                |                |                 |
| <b>Cor Total</b> | 14568.30              | 19        |                    |                |                |                 |

|                                |        |
|--------------------------------|--------|
| <b>R<sup>2</sup></b>           | 0.9785 |
| <b>Adjusted R<sup>2</sup></b>  | 0.9592 |
| <b>Predicted R<sup>2</sup></b> | 0.8825 |

**Table S3** Analysis of variance (ANOVA) for the experiments of CCD for mixed metal removal a) As b) Cd and c) Cr

**Mixed metal solution:**

**a) As**

| Source           | Sum of Squares | df | Mean Square | F-value | p-value  |                 |
|------------------|----------------|----|-------------|---------|----------|-----------------|
| <b>Model</b>     | 3966.54        | 9  | 440.73      | 171.35  | < 0.0001 | Significant     |
| A-pH             | 66.56          | 1  | 66.56       | 25.88   | 0.0005   |                 |
| B-metal Conc     | 681.11         | 1  | 681.11      | 264.80  | < 0.0001 |                 |
| C-Fungal biomass | 546.04         | 1  | 546.04      | 212.29  | < 0.0001 |                 |
| AB               | 1.26           | 1  | 1.26        | 0.4884  | 0.5006   |                 |
| AC               | 19.92          | 1  | 19.92       | 7.75    | 0.0193   |                 |
| BC               | 38.00          | 1  | 38.00       | 14.77   | 0.0032   |                 |
| A <sup>2</sup>   | 2418.53        | 1  | 2418.53     | 940.29  | < 0.0001 |                 |
| B <sup>2</sup>   | 244.50         | 1  | 244.50      | 95.06   | < 0.0001 |                 |
| C <sup>2</sup>   | 213.91         | 1  | 213.91      | 83.17   | < 0.0001 |                 |
| <b>Residual</b>  | 25.72          | 10 | 2.57        |         |          |                 |
| Lack of Fit      | 4.01           | 5  | 0.8028      | 0.1849  | 0.9562   | not significant |
| Pure Error       | 21.71          | 5  | 4.34        |         |          |                 |
| <b>Cor Total</b> | 3992.26        | 19 |             |         |          |                 |

|                                |        |
|--------------------------------|--------|
| <b>R<sup>2</sup></b>           | 0.9936 |
| <b>Adjusted R<sup>2</sup></b>  | 0.9878 |
| <b>Predicted R<sup>2</sup></b> | 0.9840 |

**b) Cd**

| Source           | Sum of Squares | df | Mean Square | F-value | p-value  |                 |
|------------------|----------------|----|-------------|---------|----------|-----------------|
| <b>Model</b>     | 497.14         | 9  | 55.24       | 26.82   | < 0.0001 | Significant     |
| A-pH             | 41.95          | 1  | 41.95       | 20.37   | 0.0011   |                 |
| B-metal Conc     | 67.93          | 1  | 67.93       | 32.98   | 0.0002   |                 |
| C-Fungal biomass | 10.58          | 1  | 10.58       | 5.14    | 0.0469   |                 |
| AB               | 2.90           | 1  | 2.90        | 1.41    | 0.2630   |                 |
| AC               | 0.0109         | 1  | 0.0109      | 0.0053  | 0.9435   |                 |
| BC               | 0.0257         | 1  | 0.0257      | 0.0125  | 0.9134   |                 |
| A <sup>2</sup>   | 322.66         | 1  | 322.66      | 156.66  | < 0.0001 |                 |
| B <sup>2</sup>   | 30.61          | 1  | 30.61       | 14.86   | 0.0032   |                 |
| C <sup>2</sup>   | 66.28          | 1  | 66.28       | 32.18   | 0.0002   |                 |
| <b>Residual</b>  | 20.60          | 10 | 2.06        |         |          |                 |
| Lack of Fit      | 14.02          | 5  | 2.80        | 2.13    | 0.2128   | not significant |
| Pure Error       | 6.58           | 5  | 1.32        |         |          |                 |
| <b>Cor Total</b> | 517.73         | 19 |             |         |          |                 |

|                                |        |
|--------------------------------|--------|
| <b>R<sup>2</sup></b>           | 0.9602 |
| <b>Adjusted R<sup>2</sup></b>  | 0.9244 |
| <b>Predicted R<sup>2</sup></b> | 0.7757 |

c) Cr

| Source           | Sum of Squares | df | Mean Square | F-value | p-value                |
|------------------|----------------|----|-------------|---------|------------------------|
| <b>Model</b>     | 2129.64        | 9  | 236.63      | 33.77   | < 0.0001 Significant   |
| A-pH             | 225.39         | 1  | 225.39      | 32.17   | 0.0002                 |
| B-metal Conc     | 303.94         | 1  | 303.94      | 43.37   | < 0.0001               |
| C-Fungal biomass | 350.54         | 1  | 350.54      | 50.03   | < 0.0001               |
| AB               | 49.45          | 1  | 49.45       | 7.06    | 0.0240                 |
| AC               | 55.39          | 1  | 55.39       | 7.90    | 0.0184                 |
| BC               | 12.18          | 1  | 12.18       | 1.74    | 0.2168                 |
| A <sup>2</sup>   | 1024.35        | 1  | 1024.35     | 146.18  | < 0.0001               |
| B <sup>2</sup>   | 108.93         | 1  | 108.93      | 15.54   | 0.0028                 |
| C <sup>2</sup>   | 125.33         | 1  | 125.33      | 17.89   | 0.0017                 |
| <b>Residual</b>  | 70.07          | 10 | 7.01        |         |                        |
| Lack of Fit      | 47.79          | 5  | 9.56        | 2.15    | 0.2110 not significant |
| Pure Error       | 22.28          | 5  | 4.46        |         |                        |
| <b>Cor Total</b> | 2199.71        | 19 |             |         |                        |

|                                |        |
|--------------------------------|--------|
| <b>R<sup>2</sup></b>           | 0.9681 |
| <b>Adjusted R<sup>2</sup></b>  | 0.9395 |
| <b>Predicted R<sup>2</sup></b> | 0.8120 |



**Table S4** Final equation for coded factors of individual and mixed metal removal by *P. chrysosporium*

| <b>Individual metal</b> | <b>Coded Equation</b>                                                                                                            |
|-------------------------|----------------------------------------------------------------------------------------------------------------------------------|
| <b>As</b>               | $B_{As} = 92.18 - 4.14 (A) - 13.10 (B) + 15.65 (C) + 3.05 (AB) - 3.49 (AC) + 3.63 (BC) - 28.05 (A^2) - 5.45 (B^2) - 6.64 (C^2)$  |
| <b>Cd</b>               | $B_{Cd} = 55.13 - 9.13 (A) - 11.75 (B) + 3.85 (C) + 2.34 (AB) - 1.10 (AC) + 0.44 (BC) - 15.35 (A^2) - 3.03 (B^2) - 6.14 (C^2)$   |
| <b>Cr</b>               | $B_{Cr} = 76.37 - 24.00 (A) - 7.361 (B) + 12.11 (C) - 0.58 (AB) + 2.42 (AC) + 4.62 (BC) - 13.82 (A^2) + 0.83 (B^2) - 7.54 (C^2)$ |
| <b>Mixed metal</b>      |                                                                                                                                  |
| <b>As</b>               | $B_{As} = 44.04 - 2.20 (A) - 7.06 (B) + 6.32 (C) + 0.39 (AB) - 1.57 (AC) + 2.17 (BC) - 12.95 (A^2) - 4.11 (B^2) - 3.85 (C^2)$    |
| <b>Cd</b>               | $B_{Cd} = 14.36 - 1.75 (A) - 2.23 (B) + 0.88 (C) + 0.60 (AB) - 0.03 (AC) + 0.05 (BC) - 4.73 (A^2) - 1.45 (B^2) - 2.14 (C^2)$     |
| <b>Cr</b>               | $B_{Cr} = 29.15 - 4.06 (A) - 4.71 (B) + 5.06 (C) + 2.48 (AB) - 2.63 (AC) + 1.23 (BC) - 8.43 (A^2) - 2.74 (B^2) - 2.94 (C^2)$     |
